# Supplementary material
Source: publisher figshare collection journal article supplement (https://acs.figshare.com/ndownloader/files/3816478)
Supplement: Supplementary file 1 [file 3816478]

**Supporting Information**  
**CO<sub>2</sub> Capture on h-BN Sheet with High Selectivity Controlled by**  
**External Electric Field**

*Hongyan Guo,<sup>1,3,4</sup> Wenhua Zhang,<sup>1,2</sup> Ning Lu,<sup>3</sup> Zhiwen Zhuo,<sup>1</sup> Xiao Cheng Zeng,<sup>4,2,5</sup>*

*Xiaojun Wu,<sup>1,2,5,\*</sup> and Jinlong Yang<sup>2,5</sup>*

<sup>1</sup>CAS Key Lab of Materials for Energy Conversion, Department of Materials Science and Engineering, University of Science and Technology of China, Hefei, Anhui 230026, China. <sup>2</sup> Synergetic Innovation Center of Quantum Information & Quantum Physics, University of Science and Technology of China, Hefei, Anhui 230026, China. <sup>3</sup>Department of Physics, Anhui Normal University, Wuhu, Anhui 241000, China. <sup>4</sup> Department of Chemistry, University of Nebraska-Lincoln, Lincoln, NE 68588, USA. <sup>5</sup>Hefei National Lab for Physical Sciences at the Microscale, University of Science and Technology of China, Hefei, Anhui 230026, China.

Table S1 Computed binding energies (in the unit of eV) at various adsorption configurations of CO<sub>2</sub> adsorbed on *h*-BN sheet.

| CO <sub>2</sub><br>orientation | Hollow | topN | topB | bridgeBN |
|--------------------------------|--------|------|------|----------|
| parallel                       | 0.37   | 0.42 | 0.41 | 0.42     |
| vertical                       | 0.19   | 0.18 | 0.17 | 0.44     |

Table S2 Computed binding energies (in the unit of eV) at various adsorption configurations of H<sub>2</sub> adsorbed on *h*-BN sheet.

| H <sub>2</sub><br>orientation | Hollow | topN | topB | bridgeBN |
|-------------------------------|--------|------|------|----------|
| parallel                      | 0.12   | 0.12 | 0.12 | 0.11     |
| vertical                      | 0.12   | 0.13 | 0.12 | 0.08     |

Table S3 Computed binding energies (in the unit of eV) at various adsorption configurations of CH<sub>4</sub> adsorbed on *h*-BN sheet. H<sub>1</sub> represents one H atom of CH<sub>4</sub>.

| CH <sub>4</sub><br>orientation | Hollow | topN | topB | bridgeBN |
|--------------------------------|--------|------|------|----------|
| H <sub>1</sub> -up             | 0.14   | 0.32 | 0.34 | 0.33     |
| H <sub>1</sub> -down           | 0.30   | 0.31 | 0.28 | 0.28     |

Table S4 Computed binding energies (in the unit of eV) at various adsorption configurations of N<sub>2</sub> adsorbed on *h*-BN sheet.

| N <sub>2</sub><br>orientation | Hollow | topN | topB | bridgeBN |
|-------------------------------|--------|------|------|----------|
| parallel                      | 0.08   | 0.23 | 0.24 | 0.12     |
| vertical                      | 0.14   | 0.02 | 0.13 | 0.24     |

Table S5 Computed binding energies (in the unit of eV) at various adsorption configurations of CO adsorbed on *h*-BN sheet.

| CO<br>orientation | Hollow | topN | topB | bridgeBN |
|-------------------|--------|------|------|----------|
| parallel          | 0.22   | 0.20 | 0.18 | 0.12     |
| vertical          | 0.10   | 0.11 | 0.12 | 0.26     |

Table S6 Computed binding energies (in the unit of eV) at various adsorption configurations of H<sub>2</sub>O adsorbed on *h*-BN sheet.

| H <sub>2</sub> O<br>orientation | Hollow | topN | topB | bridgeBN |
|---------------------------------|--------|------|------|----------|
| H-up                            | 0.12   | 0.12 | 0.12 | 0.12     |
| H-down                          | 0.16   | 0.16 | 0.17 | 0.18     |
